# Supplementary material for: What Drives the Alien Parrot Richness and Occurrence in Urban Green Spaces along the Annual Cycle in Buenos Aires City, Argentina?
Source: MDPI journal article supplement (doi:10.3390/ani13213426), 2023-11-06
Supplement: s1 [file s1]

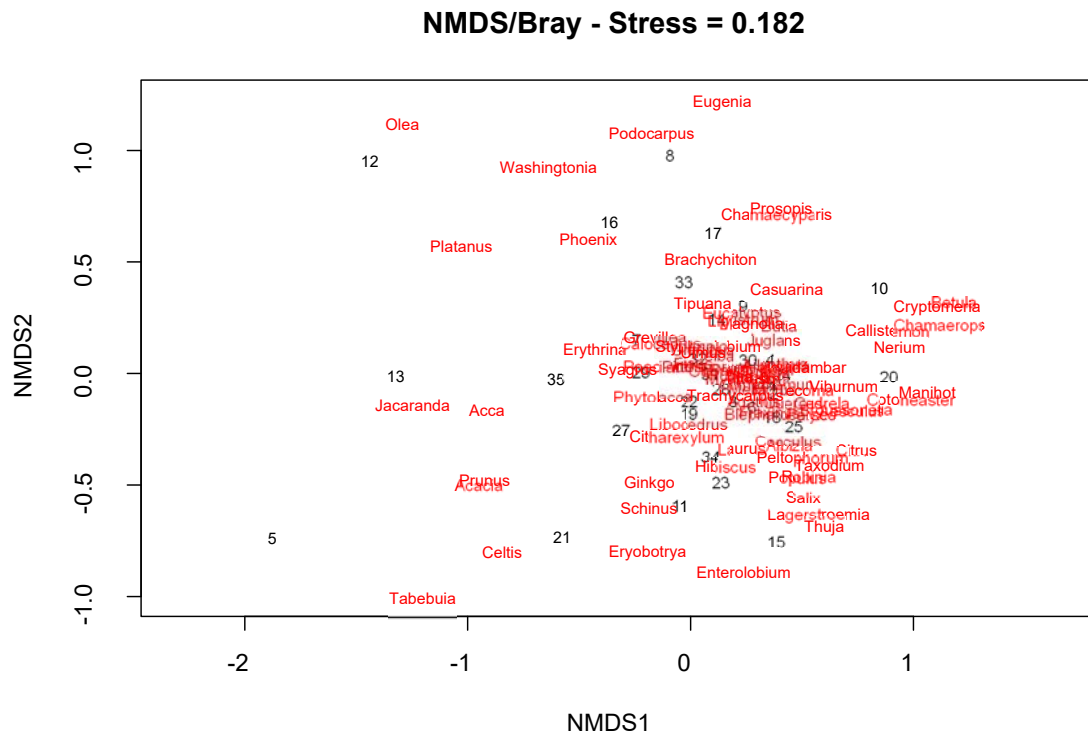

**Figure S1.** NMDS ordination analysis for the tree genera composition among parks in Buenos Aires City. The numbers (in black) represent each of the parks.
